1  
2  
3  
4  
5  
6  
7  
8  
9  
10  
11  
12  
13  
14  
15  
16  
17  
18  
19  
20  
21  
22  
23  
24  
25  
26  
27  
28  
29  
30  
31  
32

Morphological and transcriptomic evidence for ammonium induction of  
sexual reproduction in *Thalassiosira pseudonana* and other centric  
diatoms

Eric R. Moore<sup>1</sup>, Briana S. Bullington<sup>1</sup>, Alexandra J. Weisberg<sup>2</sup>, Yuan Jiang<sup>3</sup>, Jeff Chang<sup>2</sup>,  
Kimberly H. Halsey<sup>1\*</sup>

<sup>1</sup>Department of Microbiology, Oregon State University, Corvallis, Oregon 97331, USA

<sup>2</sup>Department of Botany and Plant Pathology, Oregon State University, Corvallis, Oregon 97331,  
USA

<sup>3</sup>Department of Statistics, Oregon State University, Corvallis, Oregon 97331, USA

\* Corresponding Author

E-mail: [halseyk@science.oregonstate.edu](mailto:halseyk@science.oregonstate.edu) (KHH)

## 33 **Abstract**

34 The reproductive strategy of diatoms includes asexual and sexual phases, but in many species,  
35 including the model centric diatom *Thalassiosira pseudonana*, sexual reproduction has never  
36 been observed. Furthermore, the environmental factors that trigger sexual reproduction in  
37 diatoms are not understood. Although genome sequences of a few diatoms are available, little is  
38 known about the molecular basis for sexual reproduction. Here we show that ammonium reliably  
39 induces the key sexual morphologies, including oogonia, auxospores, and spermatogonia, in two  
40 strains of *T. pseudonana*, *T. weissflogii*, and *Cyclotella cryptica*. RNA sequencing revealed 1,274  
41 genes whose expression patterns changed when *T. pseudonana* was induced into sexual  
42 reproduction by ammonium. Some of the induced genes are linked to meiosis or encode flagellar  
43 structures of heterokont and cryptophyte algae. The identification of ammonium as an  
44 environmental trigger suggests an unexpected link between diatom bloom dynamics and  
45 strategies for enhancing population genetic diversity.

## 46 **Introduction**

47           Diatoms are protists that form massive annual spring and fall blooms in aquatic  
48 environments and are estimated to be responsible for about half of photosynthesis in the global  
49 oceans [1]. This predictable annual bloom dynamic fuels higher trophic levels and initiates  
50 delivery of carbon into the deep ocean biome. Diatoms have complex life history strategies that  
51 are presumed to have contributed to their rapid genetic diversification into ~200,000 species [2]  
52 that are distributed between the two major diatom groups: centrics and pennates [3]. A defining  
53 characteristic of all diatoms is their restrictive and bipartite silica cell wall that causes them to  
54 progressively shrink during asexual cell division. At a critically small cell size and under certain  
55 conditions, auxosporulation restitutes cell size and prevents clonal death [4-6]. The entire  
56 lifecycles of only a few diatoms have been described and rarely have sexual events been  
57 captured in the environment [7-9].

58           So far, all centric diatoms appear to share the process of oogamous sexual reproduction  
59 (Fig 1). The average cell size of a population of asexually dividing diatoms decreases as a result  
60 of differential thecae inheritance. At a critically small size, cells become eligible to differentiate  
61 into male and female cells. Meiosis in the male spermatogonangium produces multinucleate  
62 spermatogonia that divide into individual haploid spermatocytes. Meiosis in the female oogonia  
63 produces a single functional haploid nucleus that is fertilized by a flagellated spermatocyte  
64 through an opening in the oogonia thecae. Fertilized oogonia expand into a large auxospore  
65 where new, large thecae are formed for the new, enlarged initial cell. Auxosporulation can also  
66 occur asexually, but it is considered an ancillary pathway for cell size restitution in diatom  
67 species that have a sexual path for reproduction [5].

68

69

70 **Fig 1. The life cycle of a centric diatom.** The average cell size of a population of asexually  
71 dividing diatoms decreases as a result of differential thecae inheritance. At a critically small size,  
72 cells can initiate sexual reproduction and differentiate into male and female cells. Meiosis in the  
73 male spermatogonangium produces multinucleate spermatogonia that divide into individual  
74 haploid spermatocytes. Meiosis in the female oogonia produces a single functional haploid  
75 nucleus that is fertilized by a flagellated spermatocyte through an opening in the oogonia thecae.  
76 Fertilized oogonia expand into a large auxospore where new, large thecae are formed for the new  
77 initial cell.

78

79

80 The environmental factors that trigger formation of sexual cells and sexual reproduction  
81 in centric diatoms are not well understood [10, 11], but sexualization appears to be strongly  
82 associated with conditions causing synchronous sexuality in cells experiencing growth stress  
83 [12]. Besides the size threshold requirement, previous observations indicate that sexualization is  
84 possible when active growth has ceased, causing cell cycle arrest [13, 14] and cell densities are  
85 sufficient to permit successful fertilization of the oogonia by the spermatocyte [15]. Light  
86 interruption with an extended dark period [13], changing salinities, and nutrient shifts [16], have  
87 sometimes been successful in inducing sexual reproduction, probably by causing cell cycle  
88 arrest. Recently, pheromones produced by the pennate diatom, *Seminavis robusta*, have been  
89 identified that cause cell cycle arrest and induce the sexual pathway [17]. However, we are aware  
90 of no method that reliably causes induction of all of the sexual stages of centric diatoms shown  
91 in figure 1.

92           The ecological importance of diatoms, combined with their potential uses in materials  
93 chemistry, drug delivery, biosensing [18, 19], and bioenergy [20, 21], prompted genome  
94 sequencing of *T. pseudonana* CCMP1335 (a ‘centric’ diatom collected from the North Atlantic  
95 Ocean) and *Phaeodactylum tricornutum* (a ‘pennate’ diatom), which have become model  
96 organisms for experimental studies [22, 23]. However, sexual morphologies have never been  
97 observed in either of these species or in the vast majority of diatoms [10]. The inability to  
98 reliably control the sexual cycle in centric diatoms has severely hindered studies to understand  
99 the silica deposition process, as well as the genetic regulation, ecology, and evolution of sex [10,  
100 24, 25]. Both of the model diatoms were thought to have repurposed their extant genetic toolkits  
101 and lost the need and ability for a sexual lifestyle [10, 11, 26].

102           Here we show that two strains of *T. pseudonana* and two other centric species, *T.*  
103 *weisflogii* and *Cyclotella cryptica*, can be reliably induced into the sexual reproductive pathway  
104 when cells are below the critical size threshold and exposed to ammonium during the stationary  
105 phase of growth. Ammonium induced oogonia, auxospore, and spermatocyte formation in each  
106 of these species. Induction of sexuality was further supported by RNA sequencing (RNAseq)  
107 which revealed 1,274 genes whose expression patterns changed when *T. pseudonana* became  
108 sexualized by ammonium. Meiosis genes and genes associated with flagellar structures of  
109 heterokont and cryptophyte algae were differentially expressed in ammonium-induced cells  
110 compared to nitrate grown cells. We anticipate that this discovery will open opportunities to  
111 study the evolution of diatom lifecycles and facilitate expansion of diatom breeding to explore  
112 functional genetics for molecular ecology, nanotechnology and biofuels applications.

113

114

## 115 **Results and discussion**

### 116 **Ammonium triggers sexual morphologies**

117 We observed *T. pseudonana* CCMP1335 cell morphologies consistent with sexual  
118 reproduction when cells were propagated in artificial seawater medium supplemented with  
119 ammonium. The proportion of cells that differentiated into sexual cell types was dependent on  
120 ammonium concentration, with up to 39% of the population identified as oogonia or auxospores  
121 in cultures supplemented with 800  $\mu\text{M}$   $\text{NH}_4\text{Cl}$  (Fig 2A). Oogonia and auxospores were first  
122 observed at the onset of stationary phase and reached maximum population proportions in late  
123 stationary phase (Fig 2A). Ammonium also induced oogonia and auxospore production in *T.*  
124 *pseudonana* CCMP1015 (collected from the North Pacific Ocean), *T. weissflogii*, and *Cyclotella*  
125 *cryptica* (S1 Fig). A few oogonia and auxospores were observed in nitrate grown cultures with  
126 no added ammonium (Fig 2A and S1). However, with the exception of nitrate grown *C. cryptica*  
127 cultures, which generated oogonia and auxospores constituting 11% of the total population,  
128 oogonia and auxospores were only a small percentage of the total population in nitrate-grown *T.*  
129 *pseudonana* and *T. weissflogii*. Even though auxospores can have diameters 3-4 times that of  
130 asexual cells, such small population proportions do not lead to discernable shifts in cell size  
131 distributions obtained by particle size analysis (e.g., Coulter counter, a commonly used method  
132 to assess population size). We initially observed auxospores when performing visual inspections  
133 using a light microscope of our cultures that were growing in ammonium. For the data reported  
134 here, oogonia and auxospores were quantified by manually counting the cell types using a  
135 hemocytometer. We suspect that reliance on laboratory instruments such as particle counters and  
136 flow cytometers in place of microscopic analysis is one reason that sexual morphologies in these  
137 well-studied diatom species have gone undetected until now. Laboratory stock cultures are

138 typically maintained in media with low concentrations of nitrogen, especially when ammonium  
139 is supplied as the nitrogen source because it has been considered to be toxic to diatoms in high  
140 concentrations [27]. Therefore, it may not be surprising that sexual cells have gone un-noticed  
141 due to the low rates of sexual induction in the presence of low ammonium concentrations (Fig.  
142 2A).

143

144

145 **Fig 2. Ammonium induces sexual morphologies in *T. pseudonana* CCMP1335. (A)**

146 Proportion of sexual cells (oogonia and auxospores) relative to the total population in cultures of  
147 *T. pseudonana* grown in the presence of NH<sub>4</sub>Cl or NaNO<sub>3</sub>; n=3 independent cultures, average of  
148 300 cells counted per replicate. Oogonia and auxospores were only observed beginning in  
149 stationary phase, data are mean values, error bars are s.d.. Inset: corresponding growth curve  
150 linking the onset of stationary phase with first appearance of sexual cells on day six. **(B)** Sexual  
151 cells were observed in cultures with NH<sub>4</sub>Cl present at inoculation (blue hatched and solid blue  
152 bars) or following NH<sub>4</sub>Cl addition at the onset of stationary phase (yellow bars). Legend shows  
153 concentration of nitrogen source provided at inoculation and concentration of nitrogen source  
154 added at the time of the second dosing. Two control treatments were supplied 200 μM nitrogen  
155 source at inoculation only. Inset: corresponding growth curve showing the onset stationary phase  
156 and timing of 2<sup>nd</sup> nitrogen addition; n=3 independent cultures, average of 281 cells counted per  
157 replicate, data are mean values, error bars are s.d..

158

159

160 Cells differentiated into oogonia and auxospores regardless of whether ammonium was  
161 supplied at inoculation or at the onset of stationary phase (Fig. 1B). Thus, it appears that  
162 stationary phase and ammonium availability are key factors that trigger formation of sexual cells  
163 in centric diatoms. Resource depletion can arrest the cell cycle [14], and the presence of  
164 ammonium at the onset of stationary phase appears to activate the sexual cycle. Auxospore  
165 formation was observed in *Cyclotella meneghiniana* during stationary phase [28], and other  
166 protists initiate sex under stress in response to nutrient depletion or oxidative DNA damage [29].  
167 Ammonium can inhibit photosynthesis [27]; however, diatoms, including *T. pseudonana*, can  
168 acclimate to millimolar ammonium concentrations [30]. It is possible that high ammonium  
169 concentrations intensify the stress condition required for the sexual pathway. Nevertheless,  
170 ammonium consistently caused formation of ten-fold more sexualized cells than the same  
171 concentrations of nitrate (Fig 2 and S1).

172 Our results showing that ammonium induced formation of sexual cells in several centric  
173 diatom species suggests that it may serve as a key environmental factor regulating the sexual  
174 lifecycle across centric diatoms. Ammonium is typically present in very low concentrations in  
175 aquatic ecosystems. However, ammonium reached 12.6 mM in a eutrophic lake where the centric  
176 diatom, *Aulacoseira subarctica*, was observed undergoing sexual reproduction [8]. Clearly,  
177 ammonium was not the growth-limiting nutrient under those conditions or in our laboratory  
178 cultures (Fig 2). *Pseudo-nitzschia* auxospore formation was positively correlated with  
179 ammonium, which was measured to be 14  $\mu$ M during a major bloom event off the coast of  
180 Washington [7]. Thus, the formation of sexual cells appears to be triggered by the presence of  
181 ammonium while at least one other growth factor becomes limiting, such as light (discussed  
182 below), phosphorous, silica [7], vitamins, or trace elements.



183 Cell differentiation in *T. pseudonana* was induced irrespective of growth rate in  
 184 exponential phase, light intensity, or light regime. However, the growth parameters did affect the  
 185 proportion of differentiated cells. Oogonia and auxospores were only 0.5% of the population  
 186 when grown under very low light (5  $\mu\text{E}$ ) with 200  $\mu\text{M}$   $\text{NH}_4\text{Cl}$  and increased to 39% when grown  
 187 under moderate light (100  $\mu\text{E}$ ) and 800  $\mu\text{M}$   $\text{NH}_4\text{Cl}$  (Table 1). The proportions of oogonia and  
 188 auxospores increased with light up to moderate intensities (70-100  $\mu\text{E}$ ) but decreased at high  
 189 (220  $\mu\text{E}$ ) intensities (Table 1), suggesting that photon flux has an important role in meeting the  
 190 energetic demands of sexual reproduction. Other work showed sexualization was more prevalent  
 191 at light <50  $\mu\text{E}$  [31] or with the addition of a dark period [13, 32, 33]. Likely, the optimum light  
 192 intensity or need for a dark period to precede sexual induction [34] is species-specific and linked  
 193 to adaptive life histories [5].

194  
 195 **Table 1.** Effects of growth parameters on induction of sexual reproduction in *T. pseudonana*  
 196 CCMP1335, *T. weissflogii* and *C. cryptica*. Oogonia and auxospores always appeared in  
 197 stationary phase. The percentage of the total population (at least 300 cells counted per replicate)  
 198 differentiated into oogonia or auxospores when grown in nitrate or ammonium is shown for the  
 199 day they were at their maximum number; data are mean values  $\pm$  s.d., biological replicates n=3.

| Species              | Light intensity ( $\mu\text{E}$ ) | Light regime | Nitrogen concentration ( $\mu\text{M}$ ) | Specific growth rate ( $\text{d}^{-1}$ ) | Oogonia and auxospores in $\text{NO}_3^-$ (%) | Oogonia and auxospores in $\text{NH}_4^+$ (%) |
|----------------------|-----------------------------------|--------------|------------------------------------------|------------------------------------------|-----------------------------------------------|-----------------------------------------------|
| <i>T. pseudonana</i> | 5                                 | 24 h         | 200                                      | 0.28                                     | 0.21 $\pm$ 0.22                               | 0.52 $\pm$ 0.52                               |
|                      | 50                                | 24 h         | 200                                      | 0.89                                     | 3.67 $\pm$ 0.55                               | 7.67 $\pm$ 0.50                               |
|                      | 50                                | 12 h/12 h    | 200                                      | 0.80                                     | 0.67 $\pm$ 0.27                               | 2.32 $\pm$ 0.52                               |
|                      |                                   | L/D          |                                          |                                          |                                               |                                               |
|                      | 220                               | 24 h         | 200                                      | 1.2                                      | 0.26 $\pm$ 0.26                               | 1.30 $\pm$ 0.91                               |
|                      | 70                                | 24 h         | 800                                      | 0.98                                     | 3.01 $\pm$ 0.52                               | 38.9 $\pm$ 0.04                               |

|                       |     |      |     |      |             |             |
|-----------------------|-----|------|-----|------|-------------|-------------|
| <i>C. cryptica</i>    | 100 | 24 h | 800 | 0.38 | 11.1 ± 2.27 | 37.6 ± 3.71 |
| <i>T. weissflogii</i> | 100 | 24 h | 800 | 0.52 | 4.50 ± 2.36 | 39.8 ± 5.65 |

200

201

## 202 **Visualization of sexual morphologies**

203 Confocal, light, and scanning electron microscopy were used to document the cell  
204 morphologies at various stages in the life history cycle of *T. pseudonana* (Fig 3 and S2). Oogonia  
205 were elongated relative to asexually growing vegetative cells and exhibited a bent morphology  
206 and swelling of the plasma membrane at the junction of the hypotheca and epitheca (Figs 3B, 3C  
207 and S2B-D). In oogonia, cellular contents became localized to the ends of the cell resulting in an  
208 apparent empty space near the area of membrane swelling where fertilization likely occurs [5].

209

210

211 **Fig 3. The life cycle stages of *T. pseudonana* (A-K), *T. weissflogii* (L) and *C. cryptica* (M-O)**  
212 **imaged using scanning electron microscopy (SEM), light (LM), and confocal microscopy**  
213 **(CFM). A:** Two vegetative cells (LM, CCMP1335). **B:** Oogonium displaying separation of  
214 thecae (arrowhead) and putative pycnotic nucleus indicated by the arrow (CFM, CCMP1015). **C:**  
215 Oogonium sharply bending at the thecae junction. Arrowhead indicates protrusion of the plasma  
216 membrane (CFM, CCMP1335). Oogonia images are representative of 38 total images. **D:**  
217 Spermatogonium containing multiple spermatocytes seen as individual red (DNA stained)  
218 clusters (CFM, CCMP1335); representative of 8 images. **E:** Motile spermatocytes (in red, arrow)  
219 with moving flagella (arrowheads, CFM, CCMP1335, representative of 10 images). **F-G:** SEM  
220 images of spermatocytes (arrowhead) attached to early oogonia (SEM, CCMP1335,  
221 representative of 20 images). **H,I:** Auxospores; representative of 60 images in CCMP1015 (H,

222 LM) and CCMP1335 (I, CFM) showing bulging where mother valve was attached (arrowhead).  
223 Two nuclei are visible in red following non-cytokinetic mitosis. **J**: Small parental cell (arrow)  
224 with initial cells produced by sexual reproduction to the left (partial valve view) and right (girdle  
225 view) indicated by the arrowheads (SEM, CCMP1335). **K**: 7 x 12  $\mu\text{m}$  initial cell (LM); j and k  
226 representative of 12 images of CCMP1335. **L**: *T. weissflogii* auxospore (LM); representative of  
227 12 similar images. **M**: *C. cryptica* spermatogonium (upper left) and vegetative cell (lower right).  
228 CFM shows stained DNA (red, arrow) and multiple nuclei in the spermatogonium. Arrowheads  
229 indicate chlorophyll autofluorescence (green). Oogonium (**N**, representative of 6 images) and  
230 auxospore (**O**, representative of 4 similar images) of *C. cryptica* (LM). Confocal microscopy  
231 images (b-e, i, m) show chlorophyll autofluorescence (green) and Hoescht 33342 stained DNA  
232 (red). Scale bars: **A**: 5  $\mu\text{m}$ ; **B-E**: 5  $\mu\text{m}$ ; **F**: 2  $\mu\text{m}$ ; **G**: 1  $\mu\text{m}$ ; **H-O**: 10  $\mu\text{m}$ .

233

234

235 *T. pseudonana* spermatogonium harbored at least eight nuclei (Fig 3D), suggesting that a  
236 depauperating mitosis preceded meiosis [11, 35]. Sperm released were very small, about 1  $\mu\text{m}$ ,  
237 and flagellated (Figs 3E and S2E, S2F), but they often became entangled with other cells and  
238 debris [8, 36, 37]. Sperm cells attached to oogonia at the junction of the thecae for fertilization  
239 (Figs 3F, 3G and S2I, S2J) as shown in *T. punctigera* [38]. Also similar to *T. punctigera*, flagella  
240 were not visible at that stage, possibly because flagella are abandoned upon attachment to the  
241 oogonia [36].

242 Oogonia developed into auxospores and these conspicuous cell morphologies were  
243 always observed in cultures induced by ammonium. Auxospores were larger than vegetative  
244 cells and oogonia, ranging from about 6 to 20  $\mu\text{m}$  in diameter, with most being 10-15  $\mu\text{m}$  in

245 diameter (Figs 3H, 3I and S2G, S2H, S2L). Auxospores were spherical, with most of the cellular  
246 contents localized to one side (Fig 3H, 3I and S2G, S2H, S2L) and sometimes showing slight  
247 distention where the mother valve was shed (Fig 3I), as described in *Stephanodiscus niagarae*  
248 [39]. Thecae remained attached in some cases, especially on smaller cells. Oogonia, auxospores,  
249 and spermatogonia in the other species studied displayed similar morphologies to those observed  
250 in *T. pseudonana* and other centric diatoms (Figs 3L-O, S2M-P and 4A) [11, 16, 28, 33, 35, 37,  
251 38, 40, 41].

252

253

254 **Fig 4. Evidence for meiosis and initial cells. A:** 18s rRNA phylogeny of diatoms including  
255 pennates (pink rectangle), centrics (blue rectangle). Highlighted in red are the four strains  
256 induced into sexual reproduction in this study. Species for which some evidence already exists  
257 for sexual reproduction are starred [9, 13, 16, 28, 33, 38]. **B-D:** Changes in DNA and chlorophyll  
258 fluorescence in exponential (EXP), stationary (STA) and late stationary (L-STA) growth phases  
259 of *T. pseudonana* induced by ammonium; 30,000 events recorded, representative of two  
260 biological replicates. **E:** Coulter Counter distributions of cell diameter for *T. pseudonana*  
261 cultures in exponential phase of growth and maintained in NaNO<sub>3</sub> (red) and after six successive  
262 25% transfers to medium with ammonium (blue). Each new culture was allowed to remain in  
263 stationary phase for three days before the next 25% transfer was made. Single replicates of  
264 cultures with cell densities of 2.4 x 10<sup>6</sup> ml<sup>-1</sup> (NaNO<sub>3</sub>) and 2.3 x 10<sup>6</sup> ml<sup>-1</sup> (ammonium). Dashed  
265 lines are the mode for each peak.

266

267

268 Changes in DNA content in *T. pseudonana* cells induced into sexuality by ammonium  
269 were observed using flow cytometry-based analysis. Fluorescence-activated cell sorting (FACS)  
270 analysis showed that as the culture progressed from exponential into stationary growth phases,  
271 the diploid population (Fig 4B) expanded to include DNA fluorescence intensities that were  
272 consistent with the presence of spermatogonangia and spermatogonia containing multiple  
273 gametes (Fig 4C). In late stationary phase, a new population was observed that had DNA  
274 fluorescence signals consistent with haploid sperm cells with little to no chlorophyll [13] (Fig  
275 4D).

276 Cell size restitution via auxosporulation produced progeny cells that were considerably  
277 larger than the parent cells from nitrate stock cultures. To induce a high proportion of the eligible  
278 cells into the sexual pathway we repeatedly propagated cultures in 800  $\mu$ M ammonium with  
279 inoculum of 25%. This strategy raises the ratio between the exposure of cells to ammonium in  
280 stationary phase and the total number of cell divisions. Our findings can be explained by  
281 assuming that cells in nitrate stock cultures are already at or below the critical size threshold for  
282 induction into sexuality, but with each passage through growth and stationary phases in batch  
283 culture, only a fraction of the eligible cells are induced into the sexual cycle. The average cell  
284 diameters of the resulting cultures were larger relative to stock cultures maintained in nitrate (Fig  
285 4E and S3). The *T. pseudonana* initial cells were 7-12  $\mu$ m, the largest size reported for this  
286 species (Figs 3J, 3K, S2K). Presuming that cell size reduction during vegetative growth occurs in  
287 *T. pseudonana*, this process of cell size reduction and cell size restitution via ammonium  
288 induction have opposing influences on the average size of populations. These processes  
289 confound the ability to observe the impacts of sexual induction without experimental designs that

290 maximize the percentage of the population induced into the sexual pathway and minimize the  
291 number of vegetative replications between episodes of induction.

292 We identified oogonia, male gametes, auxospores, and initial cells in cultures of the  
293 model centric diatom, *T. pseudonana* providing new evidence for sexuality in this species that  
294 was previously assumed to be asexual [10]. Although cell enlargement through  
295 asexual/apomictic mechanisms has been recorded in other species [42-44], the presence of all  
296 sexual cell types, and the expression of meiotic genes (discussed below), suggest apomixis is not  
297 the mechanism being used by *T. pseudonana* for cell enlargement. Furthermore, apomixis  
298 typically occurs in species that also undergo sexual reproduction [5]. Only spermatogenesis had  
299 previously been reported in *T. weissflogii* [13, 45], but we have now also documented induction  
300 of oogonia and auxospores by ammonium and subsequent formation of initial cells in this  
301 species. A major challenge in visualizing the morphological characteristics of these species is  
302 their smaller cell sizes compared to other species for which morphological details have been  
303 documented. Now that we have determined a reliable method for inducing the sexual  
304 morphologies, future studies will dissect additional details associated with the sexual pathways  
305 in these, and perhaps other species inducible by ammonium, to determine their variation from  
306 other centric diatoms. For example, the presence of auxospore scales, precise timing of  
307 fertilization and meiotic activity, repeated auxosporulation, and polyspermy events (e.g., [38]).  
308 The case of *T. pseudonana* also presents interesting questions about whether this species has  
309 retained the ability to reduce in cell size. It appears that *T. pseudonana* has the capacity to avoid  
310 clonal death by maintaining a relatively constant cell size (3-9  $\mu\text{M}$ ) [46-48]. Our experiments  
311 show that cells in this size range are inducible into the sexual pathway. Nevertheless, the

312 question remains whether the progeny of induced small cells of *T. pseudonana* are capable of  
313 cell size reduction.

314

## 315 **Gene expression analysis of ammonium induced sexual** 316 **morphologies**

317 We used RNAseq to identify genes that were differentially expressed in conditions that  
318 triggered cell differentiation into sexual morphologies. We compared the transcriptomes of *T.*  
319 *pseudonana* harvested in exponential (EXP), stationary (STA), and late stationary phases (L-  
320 STA). Cells were grown in 100  $\mu\text{M}$   $\text{NaNO}_3$  or, to capture a dose-dependent change in gene  
321 expression, either 100 or 800  $\mu\text{M}$   $\text{NH}_4\text{Cl}$  (S4 Fig). We identified genes that were significantly  
322 differentially expressed in multiple pairwise comparisons of growth phases and nitrogen sources  
323 (S1-S11 Tables). Next, we examined the statistical interactions of pairwise condition  
324 comparisons to identify genes with significantly greater or lesser magnitude changes in  
325 expression between growth stages in the presence of ammonium relative to 100  $\mu\text{M}$   $\text{NaNO}_3$  (Fig  
326 5A and S5).

327

328

329 **Fig 5. Transcriptomic evidence for sexual reproduction in *T. pseudonana*. A:** Heat map of 89  
330 genes having annotated functions that were differentially expressed during differentiation and  
331 sexual reproduction in *T. pseudonana* CCMP1335. Color indicates normalized expression value  
332 (FPKM) for each nitrogen treatment (control = 100  $\mu\text{M}$   $\text{NO}_3^-$ ; 100NH4 = 100  $\mu\text{M}$   $\text{NH}_4^+$ ;  
333 800NH4 = 800  $\mu\text{M}$   $\text{NH}_4^+$ ) and growth phase (EXP, STA, L-STA). **B:** FPKM values of select  
334 genes across growth phases for each nitrogen treatment.

335

336

337           This conservative approach yielded a total of 1,274 genes in the four analyses of  
338 statistical interactions (S12-S15 Tables). A total of 89 of the genes have an annotated function  
339 (Fig. 5A;S16 Table). The set of 89 genes includes four meiotic genes (*mcm2*, *mcm8*, *mcm9*, and  
340 *mlh1*, Fig 4B and S6) that were also up-regulated in pennate diatoms during sexual reproduction  
341 [26]. The Mcm family of DNA helicases function in DNA replication, with *mcm8*, *mcm9*, and  
342 *mlh1* having roles in double stranded break repair [49-51]. Mcm8 was one of the four genes  
343 related to meiosis that were upregulated in the pennate diatom, *Seminavis robusta* during  
344 treatment with a sex-inducing pheromone [17]. Eight genes in our list are homologous to yeast  
345 genes involved in meiosis [52] (Fig 5B,S17 Table), including genes that regulate the meiotic  
346 anaphase promoting complex (*cdc16*, *cdc23*, *ama1*) [53, 54] and *rad54*, a motor protein that  
347 regulates branch migration of Holliday junctions during homologous recombination [55].  
348 Expression of genes encoding other RAD proteins (*rad50* and *rad 51*) increased in pennate  
349 diatoms induced into meiosis [17, 26].

350           Of three ‘sexually induced genes’ that were up-regulated in *T. weissflogii* at the initiation  
351 of gametogenesis [45] and associated with sperm flagella mastigonemes [56], one, *sig3*, was  
352 significantly up-regulated in stationary phase compared to exponential phase (Fig 5B). In  
353 addition, a gene encoding an intraflagellar transport protein (IFT88) was also up-regulated in  
354 ammonium induced cells during stationary phase (Fig. 5B). An IFT system is required for  
355 flagellar assembly [57] and five genes encoding IFT particle proteins, including IFT88, and a  
356 kinesin-associated protein involved in anterograde transport were found in the *T. pseudonana*  
357 genome [58]. The genes encoding Sig3 and IFT88 are unique to flagellar structures, and their



358 differential expression in ammonium induced *T. pseudonana* compared to the nitrate-grown  
359 control treatments provide additional evidence that ammonium induced spermatogenesis in this  
360 species.

361 The MYB factor and bZIP families of proteins are transcriptional regulators that control a  
362 variety of cell processes including stress responses, development, and differentiation in plants  
363 [59]. Expression of two genes having the characteristic R2R3 MYB DNA binding domains  
364 common in plants, *myb24* and *myb16*, was generally lower in ammonium induced cultures  
365 compared to the nitrate grown controls (Fig 5B). In *Arabidopsis thaliana*, hormonal activation of  
366 *myb24* is required for stamen development and male fertility [60]. Whether *myb24*, *myb16*, and  
367 *bzip2* play roles in regulating gamete development or sex differentiation in diatoms remains to be  
368 determined.

369 The 1,274 genes provide new avenues to understand the evolution of sexuality in the  
370 Heterokont eukaryotic lineage. Diatoms emerged ~ 200 Mya, about 800 My after a eukaryotic  
371 heterotroph engulfed a red alga in the secondary endosymbiosis event that gave rise to the SAR  
372 eukaryotic supergroup [61]. Of 171 diatom genes of red algal origin [61], 17 were identified as  
373 differentially expressed in conditions that induced sexual reproduction (S18 Table). None of  
374 these genes are annotated in the *T. pseudonana* genome, but in red algae they are predicted to  
375 function in transport and plastid-targeted processes [23].

376

## 377 **Conclusions**

378 That some of the most well studied centric diatoms were never observed undergoing  
379 sexual reproduction was a mystery. Possibly even more elusive was the ability to reliably control  
380 or induce the sexual pathway of centric diatoms in the laboratory [10] despite a myriad of efforts

381 that ranged from sweet-talk to torture. Factors that have limited progress in this field center on  
382 the problem that even under ‘favorable environmental conditions’ that result in the sexual  
383 lifecycle, only a fraction of cells undergo sexual reproduction (Fig 2). Thus, capturing the sexual  
384 event requires near constant visual observation because (a) only cells that have become  
385 sufficiently small and reach the critical size threshold can undergo sexual reproduction [62], (b)  
386 only a fraction of those size-eligible cells may undergo sexual reproduction [8, 15, 16, 31], (c)  
387 there has been a lack of understanding about what constitutes conditions that are ‘favorable’ for  
388 triggering diatom sex [5, 7], and (d) morphological changes indicative of sex may not be  
389 recognized by untrained scientists [63].

390 Our results provide strong evidence that *T. pseudonana* is a sexual organism, expressing  
391 the major morphologies associated with the sexual pathway that result in enlarged initial cells.  
392 Furthermore, the sexual pathway was reliably induced in *T. pseudonana*, and two other centric  
393 diatom species by exposure of size-eligible cells to ammonium. Ammonium triggered formation  
394 of sexual cells in a dose-dependent manner and significant changes in expression of genes  
395 involved in meiosis, spermatocyte flagellar structures and assembly, and sex differentiation.  
396 RNAseq analysis revealed many more genes with unknown functions that were expressed under  
397 conditions of sexual differentiation. Other genes involved in sex are likely to have been missed  
398 by our analysis because their changes in expression were masked by the mixed population of  
399 asexual and sexual cells, or they were not captured in the coarse time-resolution of sampling  
400 used in this study. Nevertheless, our discoveries resolve two persistent mysteries that have  
401 plagued diatom researchers. Furthermore, the RNAseq data provide a subset of genes that can be  
402 used to study the molecular ecology of diatoms.

403           The ecology of centric diatom sexual reproduction that can be inferred from our findings  
404 appears best described as synchronous sexuality [12] triggered by ammonium in cells  
405 experiencing growth stress. Asexual cell cycle arrest appears to be prerequisite to activation of  
406 the diatom sexual life cycle [13, 14, 28, 29]. In the environment, diatoms bloom following  
407 elevated nutrient concentrations driven by vertical mixing, coastal upwelling, or river inputs and  
408 the bloom reaches its peak biomass when essential nutrients are depleted. Within a week, the  
409 bulk of a bloom can be consumed by heterotrophic protists [64] that excrete ammonium to  
410 maintain homeostatic elemental composition [65]. We propose that ammonium released by  
411 grazers at bloom climax may be a principal ecological trigger for sexual morphologies in centric  
412 diatoms. Synchronization of sexuality at the onset of resource depletion (stationary phase)  
413 increases the chances for successful fertilization because cell density is at its maximum [12].  
414 Environmental concentrations of ammonium in the environment rarely reach the concentrations  
415 used in this study to demonstrate the dose response effect on sexuality. Other methods that have  
416 sometimes successfully triggered sexual reproduction in other species are similarly unusual  
417 compared to environmental conditions. For example, the magnitude of the salinity shifts used to  
418 induce sexual reproduction in *Skeletonema marioni* in the laboratory do not occur in the Baltic  
419 sea [16]. Nevertheless, pulses of ammonium, shifts in salinity, and other environmental  
420 fluctuations do occur in aquatic ecosystems, and provided the other conditions for sexuality are  
421 met (e.g., cell size threshold, stress, population density), are likely to induce sexuality in at least  
422 a small fraction of a population. The presence of ammonium and the onset of stationary phase  
423 also point to involvement of another growth factor whose depletion triggers sexual reproduction.  
424 The specific collection of factors that lead to sexual reproduction in diatoms in the environment  
425 is not yet known and neither is whether ammonium is a direct or indirect trigger of sexuality [4].

426 Nevertheless, this work suggests an intriguing ecological role for ammonium in the mechanisms  
427 underlying sexuality in centric diatoms and will certainly be a valuable tool to control sexuality  
428 in the laboratory.

429 The identification of ammonium as a reliable inducer of sexuality in *T. pseudonana* and  
430 other centric diatoms has the potential to shift perspectives on diatom ecology, open avenues for  
431 the experimental investigation of diatom reproductive mechanisms, and provide tools for genetic  
432 manipulation of centric diatoms that have not heretofore been available. Diatom blooms have a  
433 global impact but the factors that control these blooms and their demise are complex and a  
434 consensus has not been reached about these processes. Our evidence suggests that induction of  
435 sexuality may play a vital role in diatom bloom conclusion and the production of genetic  
436 diversity that seeds future blooms [66]. Our analysis suggests an involvement of genes of red-  
437 algal origin, providing new lines of evolutionary enquiry. Interest in diatoms for biotechnological  
438 applications is high due to their uses in biofuels, materials chemistry and medicine. Our work  
439 will likely propel this exploration by enabling improved breeding and genetic modification to  
440 control and understand unique diatom traits.

441

## 442 **Materials and methods**

443 Stock cultures of *T. pseudonana* (CCMP1335) were maintained in f/2 medium [67] with  
444 200  $\mu\text{M}$   $\text{NaNO}_3$  under continuous sub-saturating light at 18°C. Sexual cells were quantified in  
445 triplicate cultures of *T. pseudonana* (CCMP1335 and CCMP1015), *T. weissflogii* (CCMP1336)  
446 and *C. cryptica* (CCMP332) (all obtained from NCMA) grown in f/2 amended with  $\text{NaNO}_3$  or  
447  $\text{NH}_4\text{Cl}$  and grown at 18°C under 50  $\mu\text{E}$  continuous light, or under variable light intensities/cycles

448 as shown in Table 1. Cell populations were quantified using a Coulter counter (Beckman-  
449 Coulter, Indianapolis, Indiana). Oogonia and auxospores were counted using a hemocytometer.

450 We found that a modified f/2 medium yielded better cell images using light and confocal  
451 microscopy. This medium contained 0.939 mM KCl, 0.802 mM NO<sub>3</sub><sup>-</sup>, 1 mM NH<sub>4</sub>Cl, 0.05 mM  
452 glycine, 0.01 mM methionine, 0.078 mM pyruvate, 0.84 μM pantothenate, 0.985 μM 4-amino-5-  
453 hydroxymethyl-2-methylpyrimidine, 0.3 μM thiamine, 0.002 μM biotin, 0.117 μM FeCl<sub>3</sub>\*6H<sub>2</sub>O,  
454 0.009 μM MnCl<sub>2</sub>\*4H<sub>2</sub>O, 0.0008 μM ZnSO<sub>4</sub>\*7H<sub>2</sub>O, 0.0005 μM CoCl<sub>2</sub>\*6H<sub>2</sub>O, 0.0003 μM  
455 Na<sub>2</sub>MoO<sub>4</sub>\*2H<sub>2</sub>O, 0.001 μM Na<sub>2</sub>SeO<sub>3</sub>, and 0.001 μM NiCl<sub>2</sub>\*6H<sub>2</sub>O, and sparged with filter-  
456 sterilized carbon dioxide and air for 8 hours and overnight respectively. To view DNA, 1 ml live  
457 samples were stained with 5 μl 1.62 μM Hoescht 33342 (0.2 μm filtered) for 10 min. For  
458 scanning electron microscopy (SEM), 1 ml samples were diluted 1:3 with sterile f/2 and syringe  
459 filtered onto 13 mm 0.2 μm polycarbonate filters using a Swinnex filter unit. The filter was  
460 washed with 4 ml f/2 containing 0.5% gluteraldehyde and left submerged for at least 24 hours,  
461 followed by a series of 4 ml washes: 0.2 μm filtered 80%, 60%, 40%, 20% and 0% f/2, followed  
462 by 20%, 40%, 60% 80% and 100% ethanol, before critical point drying. SEM imaging was done  
463 at the Oregon State University Electron Microscope facility.

464 For flow cytometry 1 ml culture samples were fixed with 1 μl gluteraldehyde (50%) and  
465 stained with 10 μl Sybr green mix (1:25 dilution Sybr green in 0.01M Tris-EDTA, pH 8.0) for 30  
466 min. Samples were run on a FACScan flow cytometer (Becton Dickinson, Franklin Lakes, New  
467 Jersey). Settings were FL1=582 and FL3=450 for unstained cells and FL1=450 and FL3=450 for  
468 stained cells.

469 For RNAseq analysis, 1.61x10<sup>8</sup> – 1.10x10<sup>9</sup> cells from triplicate independent cultures  
470 were filtered onto 0.8 μm 47 mm polycarbonate filters during exponential, stationary and late

471 stationary phases and flash frozen in liquid nitrogen. RNA was extracted using a Qiagen RNeasy  
472 midi kit according to modified manufacturer's instructions [68]. Silica beads (0.5 mm) were  
473 added to the cells and lysis buffer and vortexed until homogeneous before being filtered through  
474 Qias shredder columns to remove large particles. Eluted RNA was subjected to off column RNase  
475 free DNase I treatment and secondary purification according to manufacturer's  
476 recommendations. Total RNA was prepared and sequenced as a 150 bp single end library on an  
477 Illumina HiSeq 3000 at the Center for Genome Research and Biocomputing at Oregon State  
478 University. Sequencing data/interaction analyses were conducted using the Ballgown pipeline  
479 [69]. Sequencing reads were trimmed to remove sequencing adapters using BBDuk v. with the  
480 parameters " ktrim=r k=23 mink=9 hdist=1 minlength=100 tpe tbo" [70]. Reads aligned to the *T.*  
481 *pseudonana* reference genome (NCBI accession GCA\_000149405.2) using HISAT2 v. 2.0.4  
482 with the parameters " --min-intronlen 20 --max-intronlen 1500 --rna-strandness F --dta-cufflinks"  
483 [71]. Transcripts were assembled for each dataset and merged using Stringtie v 1.2.4 [72].  
484 Pairwise differential expression analyses for genes were performed using the "stattest" function  
485 in Ballgown version 2.2.0 [73]. Interaction effects were tested by comparing the models with  
486 (timepoint + treatment + timepoint \* treatment) and without (timepoint + treatment) the  
487 interaction term using the custom model option in the "stattest" function.

488 For construction of the phylogenetic tree, 18s rRNA sequences were obtained from the  
489 Silva database and aligned using Muscle v3.8.31 (default settings) [74]. A genome editor  
490 (BioEdit) was used to manually trim off overhanging sequence. The tree was built using  
491 RAxML-HPC v8.0.26 using the GTRCAT model, "-f a" option, and 1000 bootstrap replicates  
492 [75]. A visual representation was created using the TreeDyn [76] tool through LIRMM  
493 (phylogeny.fr) [77].

494 All RNAseq data have been deposited to NCBI under BioProject ID PRJNA391000.

495

## 496 **Acknowledgements**

497 The authors thank Kelsey McBeain for assistance with confocal microscopy imaging and the

498 Electron Microscope Facility at Oregon State University for scanning electron micrographs.

499

## References

1. Nelson DM, Tréguer P, Brzezinski MA, Leynaert A, Quéguiner B. Production and dissolution of biogenic silica in the ocean: Revised global estimates, comparison with regional data and relationship to biogenic sedimentation *Biogeochem Cycles*. 1995;9(3):359-72.
2. Mann DG. The species concept in diatoms. *Phycologia*. 1999;38:437-95.
3. Simonsen R. The diatom system: Ideas on phylogeny. *Bacillaria*. 1979;2:9-71.
4. Lewis WM. The diatom sex clock and its evolutionary importance. *Amer Naturalist*. 1984;123:73-80.
5. Chepurnov VA, Mann DG, Sabbe K, Vyverman W. Experimental studies on sexual reproduction in diatoms. In: Jeon KW, editor. *A Survey of Cell Biology. International Review of Cytology*. 237. London, UK: Elsevier Academic Press; 2004. p. 91-154.
6. Drebes. Sexuality. In: Werner D, editor. *The Biology of Diatoms. Botanical Monographs*. 13. Oxford: Blackwell Scientific Publications; 1977. p. 250-83.
7. Holtermann KE, Bates SS, Trainer VL, Odell A, Armbrust EV. Mass sexual reproduction in the toxigenic diatoms *Pseudo-Nitzsca australis* and *P. pungens* (Bacillariophyceae) on the Washington coast, USA. *J Phycol*. 2010;46:41-52. doi: 10.1111/j.1529-8817.2009.00792.x.
8. Jewson DH. Size reduction, reproductive strategy and the life cycle of a centric diatom. *Philos T R Soc B*. 1992;336:191-213.
9. Koester JA, Brawley SH, Karp-Boss L, Mann DG. Sexual reproduction in the marine centric diatom *Ditylum brightwellii* (Bacillariophyta). *Eur J Phycol*. 2008;42(4):351-66.



10. Chepurnov VA, Mann DG, von Dassow P, Vanormelingen P, Gillard J, Inze D, et al. In search of new tractable diatoms for experimental biology. *BioEssays*. 2008;30:692-702.
11. Von Dassow P, Montresor M. Unveiling the mysteries of phytoplankton life cycles: patterns and opportunities behind complexity. *J Plankton Res*. 2011;33(1):3-12.
12. Edlund MB, Stoermer EF. Ecological, evolutionary, and systematic significance of diatom life histories. *J Phycol*. 1997;33:897-918.
13. Armbrust EV, Chisholm SW, Olson RJ. Role of light and the cell cycle on the induction of spermatogenesis in a centric diatom. *J Phycol*. 1990;26(3):470-8. doi: 10.1111/j.0022-3646.1990.00470.x.
14. Huysman MJJ, Vyverman W, De Veylder L. Molecular regulation of the diatom cell cycle. *J Exp Bot*. 2014;65(10):2573-84.
15. Assmy P, Henjes J, Smetacek V, Montresor M. Auxospore formation in the silica-sinking oceanic diatom *Fragilariopsis kerguelensis* (Bacillariophyceae). *J Phycol*. 2006;42:1002-6.
16. Godhe A, Kremp A, Montresor M. Genetic and microscopic evidence for sexual reproduction in the centric diatom *Skeletonema marinoi*. *Protist*. 2014;165(4):401-16. doi: 10.1046/j.protis.2014.04.006.
17. Moeys S, Frenkel J, Lembke C, Gillard JTF, Devos V, Van den Berge K, et al. A sex-inducing pheromone triggers cell cycle arrest and mate attraction in the diatom *Seminavis robusta*. *Sci Reports*. 2016;6:19252. doi: 10.1038/srep19252.
18. Ezzati J, Dolatabadi N, de la Guardia M. Applications of diatoms and silica nanotechnology in biosensing, drug and gene delivery, and formation of complex metal nanostructures. *J Analyt Chem*. 2011;30(9):1538-48.

19. Kroth P. Molecular biology and the biotechnological potential of diatoms. *Adv Exp Med Biol.* 2007;616:23-33.
20. d'Ippolito G, Sardo A, Paris D, Vella FM, Adelfi MG, Botte P, et al. Potential of lipid metabolism in marine diatoms for biofuel production. *Biotechnology for Biofuels.* 2015;8:28-38. doi: 10.1186/s13068-015-0212-4.
21. Hildebrand D, Smith SR, Traller JC, Abbriano RM. The place of diatoms in the biofuels industry. *Biofuels.* 2012;3(2):221-40.
22. Armbrust EV, Berges JA, Bowler C, Green BR, Martinez D, Putnam NH, et al. The genome of the diatom *Thalassiosira pseudonana*: Ecology, evolution, and metabolism. *Science.* 2004;306:79-86.
23. Bowler CB, Allen AE, Badger JH, Grimwood J, Jabbari K, Kuo A, et al. The *Phaeodactylum* genome reveals the evolutionary history of diatom genomes. *Nature.* 2008;456(7219):239-44.
24. Chepurnov VA, Chaerle P, Roef L, Van Meirhaeghe A, Vanhoutte K. Classical breeding in diatoms: Scientific background and practical perspectives. *Diatom Biology. Cellular Origin, Life in Extreme Habitats and Astrobiology.* 19: Springer; 2011. p. 167-94.
25. Apt KE, Kroth-Pancic PG, Grossman A. Stable nuclear transformation of the diatom *Phaeodactylum tricornutum*. *Mol Gen Genet.* 1996;252(5):572-9.
26. Patil S, Moeys S, Von Dassow P, Huysman MJJ, Mapleson D, De Veylder L, et al. Identification of the meiotic toolkit in diatoms and exploration of meiosis-specific *SPO11* and *RAD51* homologs in the sexual species *Pseudo-nitzschia multistriata* and *Seminavis robusta*. *BMC Genomics.* 2015;2015(930). doi: 10.1186/s12864-015-1983-5.

27. Yoshiyama K, Sharp JH. Phytoplankton response to nutrient enrichment in an urbanized estuary: Apparent inhibition of primary production by overeutrophication. *Limnol Oceanogr.* 2006;51(1, part 2):424-34.
28. Hoops HJ, Floyd GL. Ultrastructure of the centric diatom, *Cyclotella meneghiniana*: vegetative cell and auxospore development. *Phycologia.* 1979;18:424-35.
29. Bernstein H, Bernstein C. Evolutionary origin of recombination during meiosis. *BioScience.* 2010;60(7):498-505. doi: 10.1525/bio.2010.60.7.5.
30. Collos Y, Harrison PJ. Acclimation and toxicity of high ammonium concentrations to unicellular algae. *Mar Poll Bull.* 2014;80(1-2):8-23. doi: 10.1016/j.marpolbul.2014.01.006.
31. Mouget J-L, Gastineau R, Davidovich O, Gaudin P, Davidovich NA. Light is a key factor in triggering sexual reproduction in the pennate diatom *Haslea ostrearia*. *FEMS Microbiol Ecol.* 2009;69(2):194-201.
32. Vaulot D, Chisholm SW. A simple model for the growth of phytoplankton populations in light/dark cycles. *J Plankton Res.* 1987;9:345-66.
33. Mills KE, Kaczmarska I. Autogamic reproductive behavior and sex cell structure in *Thalassiosira angulata* (Bacillariophyta). *Botanica Mar.* 2006;49:417-30. doi: 10.1515/BOT.2006.053.
34. Gillard J, Devos V, Huysman MJJ, De Veylder L, D'Hondt S, Martens C, et al. Physiological and transcriptomic evidence for a close coupling between chloroplast ontogeny and cell cycle progression in the pennate diatom *Seminavis robusta*. *Plant Physiol.* 2008;148:1394-411. doi: 10.1104/pp.108.122176.

35. Kaczmarska I, Pouličková A, Sato S, Edlund MB, Idei M, Watanabe T, et al. Proposals for a terminology for diatom sexual reproduction, auxospores and resting stages. *J Diatom Res.* 2013;28(3):263-94.
36. French III FW, Hargraves PE. Spore formation in the life cycles of the diatoms *Chaetoceros diadema* and *Leptocylindrus danicus*. *J Phycol.* 1985;21:477-83.
37. Idei M, Osada K, Sato S, Toyoda K, Nagumo T, Mann DG. Gametogenesis and auxospore development in *Actinocyclus* (Bacillariophyta). *PLOS One.* 2012;7(8):e41890.
38. Chepurnov VA, Mann DG, Von Dassow P, Armbrust EV, Sabbe K, Dasseville R, et al. Oogamous reproduction, with two-step auxosporulation, in the centric diatom *Thalassiosira punctigera* (Bacillariophyta). *J Phycol.* 2006;42:845-58. doi: 10.1111/j.1529-8817.2006.00244.x.
39. Edlund MB, Stoermer EF. Sexual reproduction in *Stephanodiscus niagarae* (Bacillariophyta). *J Phycol.* 1991;27:780-93.
40. Idei M, Sato S, Nagasato C, Motomura T, Toyoda K, Nagumo T, et al. Spermatogenesis and auxospore structure in the multipolar centric diatom *Hydrosera*. *J Phycol.* 2015;51(1):144-58.
41. Shirokawa Y, Shimada M. Sex allocation pattern of the diatom *Cyclotella meneghiniana*. *Proceedings of the Royal Society B: Biological Sciences.* 2013;280(1761):20130503.
42. Nagai S, Hori Y, Manabe T, Imai I. Restoration of cell size by vegetative cell enlargement in *Coscinodiscus wailesii* (Bacillariophyceae). *Phycologia.* 1995;34(6):533-5.

43. Sabbe K. Apomixis in *Achnanthes* (Bacillariophyceae); development of a model system for diatom reproductive biology. *Eur J Phycol.* 2004;39:327-41.
44. Gallagher JC. Cell Enlargement in *Skeletonema costatum* (Bacillariophyceae). *J Phycol.* 1983;19:539-42.
45. Armbrust EV. Identification of a new gene family expressed during the onset of sexual reproduction in the centric diatom *Thalassiosira weissflogii*. *Appl Environ Microbiol.* 1999;65:3121-8.
46. Hildebrand M, Frigeri LG, Davis AK. Synchronized growth of *Thalassiosira pseudonana* (Bacillariophyceae) provides novel insights into cell-wall synthesis processes in relation to the cell cycle. *J Phycol.* 2007;43:730-40.
47. Hildebrand M, York E, Kelz JI, Davis AK, Frigeri LG, Allison DP, et al. Nanoscale control of silica morphology and three-dimensional structure during diatom cell wall formation. *J Mater Res.* 2006;21(10):2689-98.
48. Round FE. The problem of size reduction in diatoms. *Nova Hedwig.* 1972;23:291-303.
49. Lutzmann M, Grey C, Traver S, Ganier O, Maya-Mendoza A, Ranisavljevic N, et al. MCM8- and MCM9-deficient mice reveal gametogenesis defects and genome instability due to impaired homologous recombination. *Mol Cell.* 2012;47(4):523-34.
50. Park J, Long DT, Lee KY, Abbas T, Shibata E, Negishi M, et al. The MCM8-MCM9 complex promotes RAD51 recruitment at DNA damage sites to facilitate homologous recombination. *Mol Cell Biol.* 2013;33(8):1632-44.
51. Baker SM, Plug AW, Prolla TA, Bronner CE, Harris AC, Yao X, et al. Involvement of mouse Mlh1 in DNA mismatch repair and meiotic crossing over. *Nat Genet.* 1996;13(3):336-42.

52. Butler G, Rasmussen MD, Lin MF, Santos MAS, Sakthikumar S, Munro CA, et al. Evolution of pathogenicity and sexual reproduction in eight *Candida* genomes. *Nature*. 2009;459:657-62. doi: 10.1038/nature08064.
53. Cooper KF, Mallory JJ, Egeland DB, Jarnik M, Strich R. Ama1p is a meiosis-specific regulator of the anaphase promoting complex/cyclosome in yeast. *PNAS*. 2000;97(26):14548-53. doi: 10.1073/pnas.250351297.
54. Zachariae W, Shevchenko A, Andrews PD, Ciosk R, Galova M, Stark MJR, et al. Mass spectrometric analysis of the anaphase-promoting complex from yeast: Identification of a subunit related to cullins. *Science*. 1998;279(5354):1216-9.
55. Mazin AV, Mazina OM, Bugreev DV, Rossi MJ. Rad54, the motor of homologous recombination. *DNA Repair*. 2010;9(3):286-302.
56. Honda D, Shono T, Kimura K, Fujita S, Iseki M, Makino Y, et al. Homologs of the sexually induced gene 1 (*sig1*) product constitute the Stramenopile mastigonemes. *Protist*. 2007;158(1):77-88.
57. Rosenbaum JL, Witman GB. Intraflagellar transport. *Nat Rev Mol Cell Biol*. 2002;3:813-25.
58. Merchant SS, Prochnik SE, Vallon O, Harris EH, Karpowicz SJ, Witman GB, et al. The *Chlamydomonas* genome reveals the evolution of key animal and plant functions. *Science*. 2007;318(5848):245-50. doi: 10.1126/science.1143609.
59. Ambawat S, Sharma P, Yadav NR, Yadav RC. MYB transcription factor genes as regulators for plant responses: an overview. *Physiol Mol Biol Plants*. 2013;19(3):307-21. doi: 10.1007/s12298-013-0179-1.

60. Cheng H, Song S, Xiao LX, Soo HM, cheng Z, Xie D, et al. Gibberellin acts through jasmonate to control the expression of *MYB21*, *MYB24*, and *MYB57* to promote stamen filament growth in *Arabidopsis*. *Plos Genet.* 2009;5. doi: 10.1371/journal.pgen.1000440.
61. Archibald JM. The puzzle of plastid evolution. *Curr Biol.* 2009;19(2):R81-R8.
62. Geitler L. Der Formwechsel der pennaten Diatomeen. *Arch Protistenk.* 1932;78(1):1-226.
63. Mann DG. Why didn't Lund see sex in *Asterionella*? A discussion of the diatom life cycle in nature. In: Round FE, editor. *Algae and the Aquatic Environment, contributions in honour of JWG Lund*. Bristol: Biopress; 1988. p. 384-412.
64. Tillmann U. Interactions between planktonic microalgae and protozoan grazers. *J Euk Microbiol.* 2004;51:156-68.
65. Sterner RW, Elser JJ. *Ecological stoichiometry: the biology of elements from molecules to the biosphere*. Princeton, New Jersey, USA: Princeton University Press; 2002.
66. Chen G, Rynearson TA. Genetically distinct populations of a diatom co-exist during the North Atlantic spring bloom. *Limnol Oceanogr.* 2016;61(6):2165-79. doi: 10.1002/lno.10361.
67. Guillard RRL. Culture of phytoplankton for feeding marine invertebrates. In: Smith WL, Chanley MH, editors. *Culture of Marine Invertebrate Animals*. New York: Plenum Press; 1975. p. 26-60.
68. Dyhrman ST, Jenkins BD, Rynearson TA, Saito MA, Mercier ML, Alexander H, et al. The transcriptome and proteome of the diatom *Thalassiosira pseudonana* reveal a diverse phosphorus stress response. *PLOS One.* 2012;7(3):e33768. doi: 10.1371/journal.pone.0033768.

69. Pertea M, Kim D, Pertea GM, Leek JT, Salzberg SL. Transcript-level expression analysis of RNA-seq experiments with HISAT, StringTie and Ballgown. *Nat Prot.* 2016;11:1650-67. doi: 10.1038/nprot.2016.095.
70. Bushnell B. BBtools 2016.
71. Kim D, Langmead B, Salzberg SL. HISAT: a fast spliced aligner with low memory requirements. *Nat Methods.* 2015;12:357-60.
72. Pertea M, Pertea GM, Antonescu CM, Chang TC, Mendell JT, Salzberg SL. StringTie enables improved reconstruction of a transcriptome from RNA-seq reads. *Nat Biotech.* 2015;33(290-295):290-5.
73. Frazee AC, Pertea GM, Jaffe AE, Langmead B, Salzberg SL, Leek JT. Ballgown bridges the gap between transcriptome assembly and expression analysis. *Nat Biotech.* 2015;33(3):243-6.
74. Edgar RC. MUSCLE: a multiple sequence alignment method with reduced time and space complexity. *BMC Bioinformatics.* 2004;19(5):113.
75. Stamatakis A. RAxML-VI-HPC: maximum likelihood-based phylogenetic analyses with thousands of taxa and mixed models. *Bioinformatics.* 2006;22:2688-90.
76. Chevenet F, Brun C, Bañuls AL, Jacq B, Christen R. TreeDyn: towards dynamic graphics and annotations for analyses of trees. *BMC Bioinformatics.* 2006;7:439.
77. Dereeper A, Guignon V, Blanc G, Audic S, Buffet S, Chevenet F, et al. Phylogeny.fr: robust phylogenetic analysis for the non-specialist. *Nucleic Acids Res.* 2008;1(36):W465-W9.



## 1 **Supporting Information**

### 2 **S1 Fig. Ammonium induces sexual morphologies in *T. weissflogii* (A) and *C. cryptica* (B).**

3 Proportion of sexual cells (oogonia and auxospores) relative to the total population in cultures  
4 supplemented with NH<sub>4</sub>Cl or NaNO<sub>3</sub>. An average of 120 and 107 cells were counted per  
5 replicate of *T. weissflogii* and *C. cryptica*, respectively, throughout the growth curve, but oogonia  
6 and auxospores were only observed beginning in stationary phase; independent cultures n=3,  
7 data are mean values, error bars are s.d.. Inset: corresponding growth curve linking the onset of  
8 stationary phase with first appearance of sexual cells on day 10 (A) and 17 (B).

### 10 **S2 Fig. The different life stages in *T. pseudonana* (A-L), *T. weissflogii* (M,N) and *C. cryptica***

11 **(O,P). A:** SEM of vegetative cells (CCMP1335). **B-D:** SEM (B) and CFM images of  
12 CCMP1335 oogonia, displaying separation of the thecae and expansion of the membrane. **E:**  
13 CFM image of flagellated spermatocytes with stained DNA (arrowheads), **F, G.** Epifluorescence  
14 (F) and LM images of the same view. In F, an active, flagellated spermatocyte (arrowhead)  
15 possibly associated with an auxospore surface is revealed by lateral light from fluorescence of  
16 DNA (blue) and chlorophyll (red). **H,L:** Auxospores of CCMP1015 and CCMP1335  
17 respectively (CFM). **I,J:** Individual spermatocytes attached to oogonia (SEM). **K:** Initial cells of  
18 *T. pseudonana* CCMP1335 (LM). **M,N:** *T. weissflogii* vegetative cells (M; LM) and auxospore  
19 (N; LM). **O,P:** *C. cryptica* oogonia (O; LM) and auxospores (P; LM). CFM images (C-E, H, L)  
20 show fluorescence of DNA in red and chlorophyll in green.

### 22 **S3 Fig. Coulter Counter distributions of cell diameter for *T. weissflogii* (A) and *C. cryptica* (B)**

23 cultures in exponential phases of growth and maintained in NaNO<sub>3</sub> (red) and after two successive

24 25% transfers to media with ammonium (blue), Each new culture was allowed to remain in  
25 stationary phase for three days before the next 25% transfer was made. Single replicates. Dashed  
26 lines are the mode for each peak. Cell densities in (A) are  $2.2 \times 10^5 \text{ ml}^{-1}$  ( $\text{NaNO}_3$ ) and  $3.3 \times 10^5$   
27  $\text{ml}^{-1}$  (ammonium) and (B) are  $1.6 \times 10^6 \text{ ml}^{-1}$  ( $\text{NaNO}_3$ ) and  $2.2 \times 10^6 \text{ ml}^{-1}$  (ammonium).

28

29 **S4 Fig. *T. pseudonana* CCMP1335 growth and collection for RNAseq analysis.** Three  
30 independent cultures of each nitrogen treatment were harvested 3, 5, and 8 days after inoculation  
31 (down arrows) in exponential (EXP), stationary (STA) and late stationary phases (L-STA). The  
32  $100\mu\text{M NH}_4^+$  STA treatment did not yield sufficient RNA for analysis.

33

34 **Table S1. Pairwise comparison, Stationary phase 800  $\mu\text{M}$  Ammonium vs. exponential**  
35 **phase 800  $\mu\text{M}$  Ammonium.**

36

37 **Table S2. Pairwise comparison, Late-stationary phase 800  $\mu\text{M}$  Ammonium vs. exponential**  
38 **phase 800  $\mu\text{M}$  Ammonium.**

39

40 **Table S3. Pairwise comparison, Exponential phase 100  $\mu\text{M}$  Ammonium vs. Late stationary**  
41 **phase 100  $\mu\text{M}$  Ammonium.**

42

43 **Table S4. Pairwise comparison, Stationary phase 800  $\mu\text{M}$  Ammonium vs. Late stationary**  
44 **phase 800  $\mu\text{M}$  Ammonium.**

45

46 **Table S5. Pairwise comparison, Exponential phase nitrate vs. Exponential phase 800  $\mu\text{M}$**

47 **Ammonium.**

48

49 **Table S6. Pairwise comparison, Stationary phase nitrate vs. Stationary phase 800  $\mu\text{M}$**

50 **Ammonium.**

51

52 **Table S7. Pairwise comparison, Late Stationary phase nitrate vs. Late Stationary phase 800**

53  **$\mu\text{M}$  Ammonium.**

54

55 **Table S8. Pairwise comparison, Exponential phase nitrate vs. Exponential phase 100  $\mu\text{M}$**

56 **Ammonium.**

57

58 **Table S9. Pairwise comparison, Late Stationary phase nitrate vs. Late Stationary phase 100**

59  **$\mu\text{M}$  Ammonium.**

60

61 **Table S10. Pairwise comparison, Exponential phase 100  $\mu\text{M}$  Ammonium vs. Exponential**

62 **phase 800  $\mu\text{M}$  Ammonium.**

63

64 **Table S11. Pairwise comparison, Late Stationary phase 100  $\mu\text{M}$  Ammonium vs. Late**

65 **Stationary phase 800  $\mu\text{M}$  Ammonium.**

66

67 **S5 Fig. Interaction analysis workflow of RNAseq data.** Growth phase A vs. B is EXP vs.  
68 STA, EXP vs. L-STA, or STA vs. L-STA, respectively.  $\Delta_{exp}$  is the magnitude of change in gene  
69 expression between growth phases for the different nitrogen treatments.

70

71 **Table S12. Interaction analysis, Exponential - Stationary phases (800  $\mu$ M Ammonium v.  
72 Nitrate control).**

73

74 **Table S13. Interaction analysis, Exponential - Late Stationary phases (800  $\mu$ M Ammonium  
75 v. Nitrate control).**

76

77 **Table S14. Interaction analysis, Exponential - Late Stationary phases (100  $\mu$ M Ammonium  
78 v. Nitrate control).**

79

80 **Table S15. Interaction analysis, Stationary - Late Stationary phases (800  $\mu$ M Ammonium v.  
81 Nitrate control).**

82

83 **Table S16. Genes that were identified as differentially expressed in conditions that  
84 triggered cell differentiation and sexual reproduction and have annotated functions.**

85

86 **Table S17. Genes that were identified as differentially expressed in conditions that  
87 triggered cell differentiation and sexual reproduction and are homologous to yeast genes  
88 involved in meiosis.**

89

90 **Table S18. Genes that were identified as differentially expressed in conditions that**  
91 **triggered cell differentiation and sexual reproduction and are of red algal origin.**

92

93 **S6 Fig. Expression values (FPKM) of 15 selected genes across the three growth phases for**  
94 **each nitrogen treatment.**

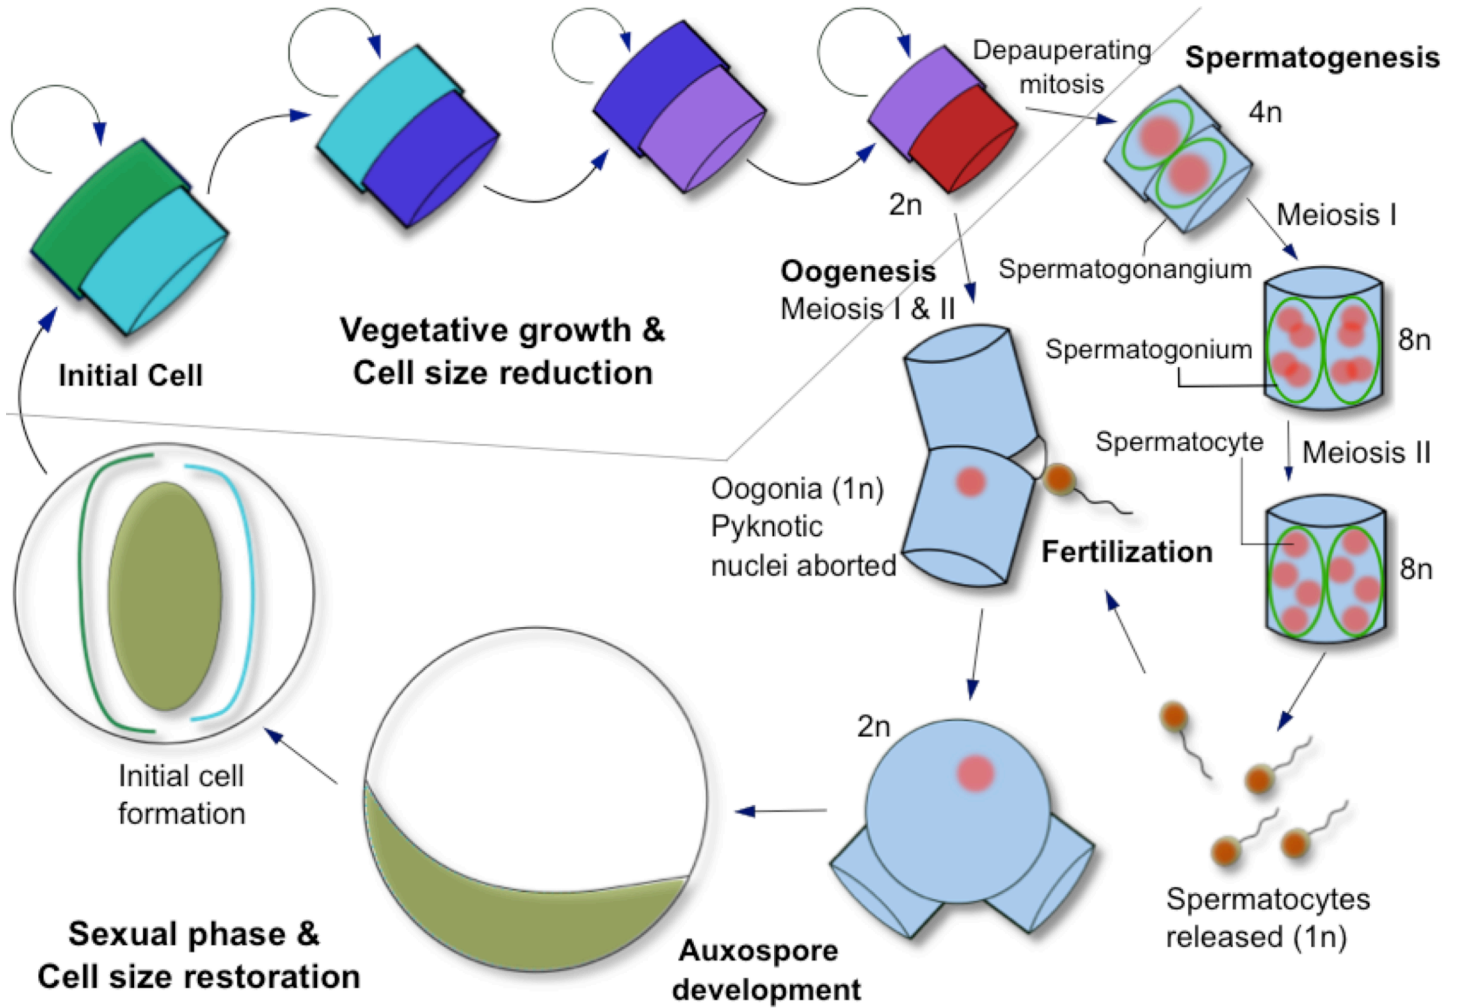

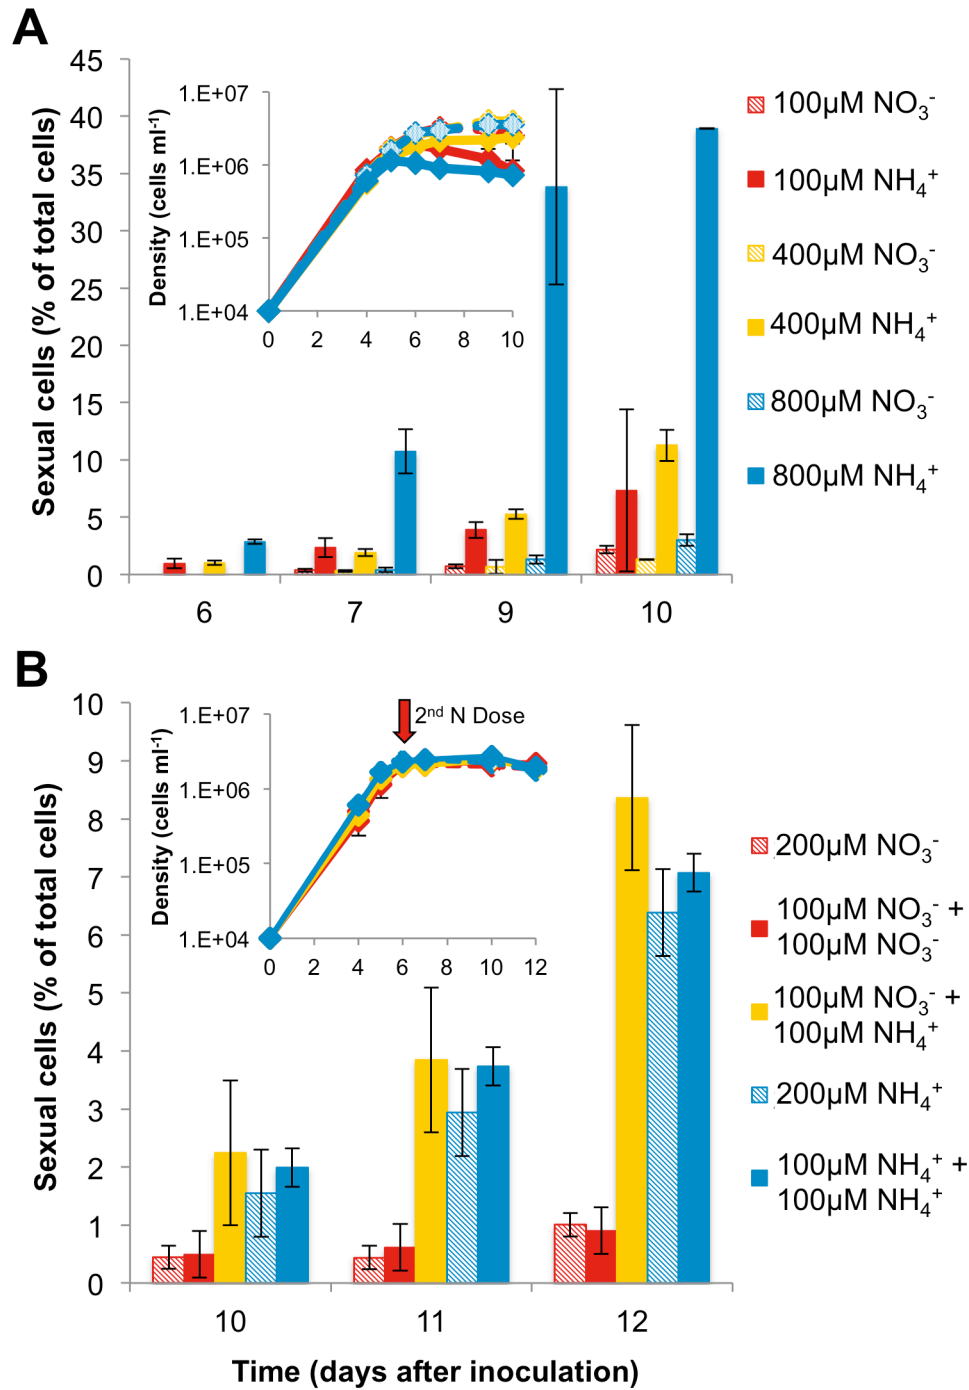

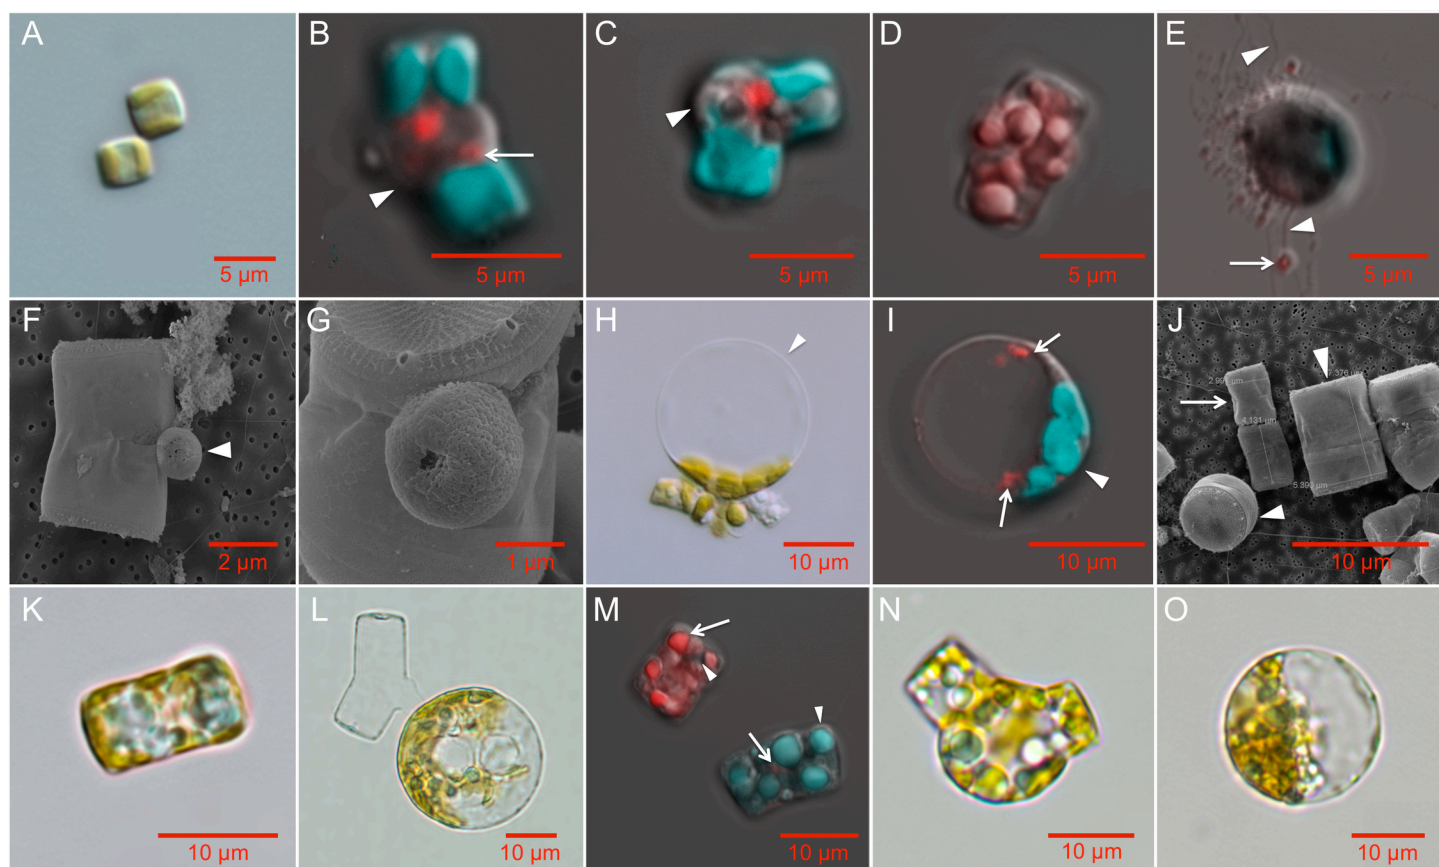





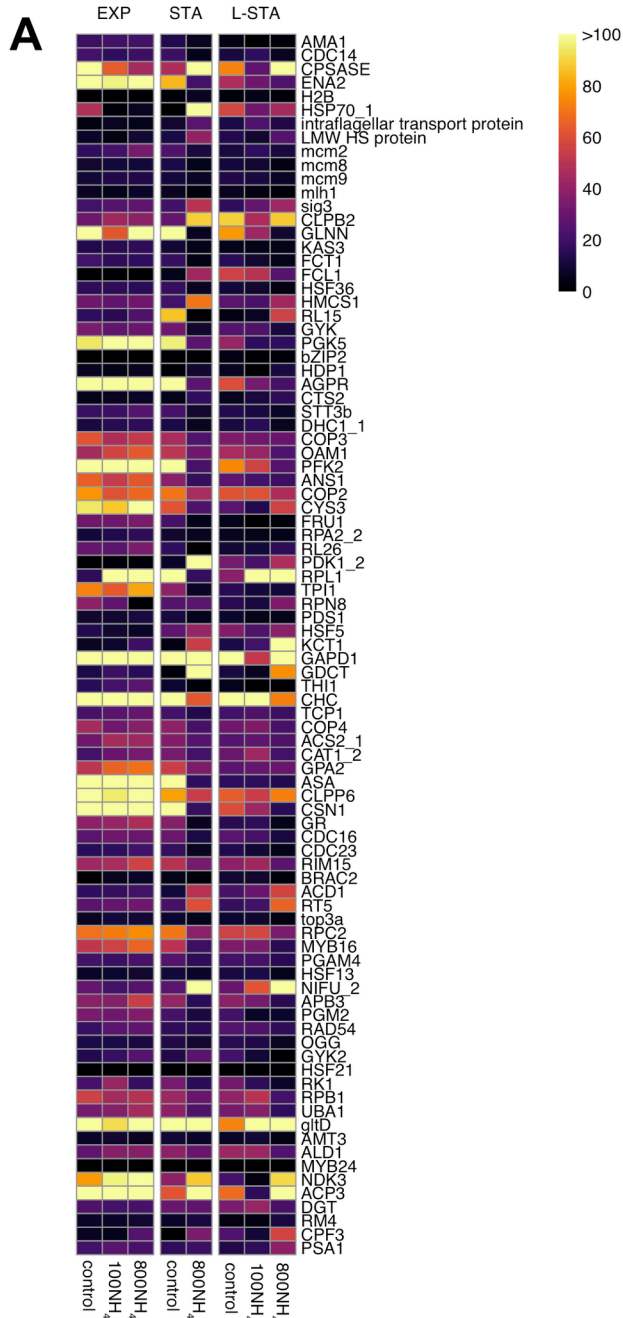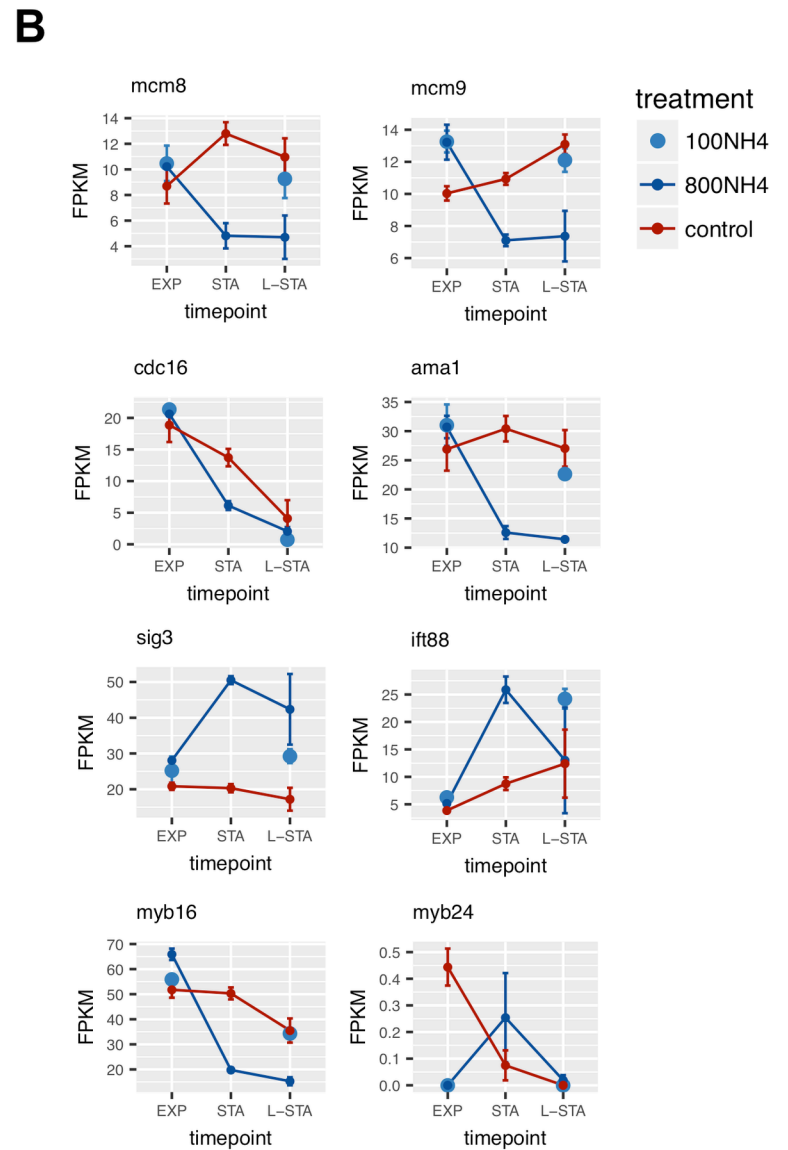

Source: https://www.biorxiv.org/content/10.1101/144667v2.full.pdf
